# Supplementary material for: The Peach (Prunus persica) CBL and CIPK Family Genes: Protein Interaction Profiling and Expression Analysis in Response to Various Abiotic Stresses
Source: MDPI journal article supplement (doi:10.3390/plants11213001), 2022-11-07
Supplement: s1 [file s1]

**Table S1.** The sequences information of CBL each conserved motif.

|                |                                                            |
|----------------|------------------------------------------------------------|
| <b>Motif 1</b> | <b>NGVIEFEEFVRALS VFHPNAPJEDKIDFAFRLYDLRQTGFIERZEVKQMV</b> |
| Motif 2        | DKTFEEADTKKDGKIDKEEWKEFVLKHPSSLKNMTLPYLDITTTFPSFV          |
| Motif 3        | IHKEEFQLALFKTRKKENLFADRVFDLFDVVKR                          |
| Motif 4        | QSPGYEDPEVLASETPFTVNEVEALYELFKKJSSSVIDDGL                  |
| Motif 5        | ESDMKLSDDVIESIV                                            |
| Motif 6        | MLQCIDGLKHLCASLLRCCD                                       |
| Motif 7        | MGCFSSKA                                                   |
| Motif 8        | RSSSLSIGEKJCAVFIPFIAJVEALVFSVAGCFDRRRQEP                   |
| Motif 9        | NSEVED                                                     |
| Motif 10       | FLHCFC                                                     |

**Table S2.** The sequences information of CIPK each conserved motif.

|                |                                                           |
|----------------|-----------------------------------------------------------|
| <b>Motif 1</b> | <b>DGLLHTTCGTPAYVAPEVJNKKGYDGAKADIWSCGVILFVLLAGYLPFDD</b> |
| Motif 2        | EDVARKYFQQQLISAVDYCHSRGVYHRDLKPENLLLDENGNLKVSDFGLSA       |
| Motif 3        | NLMAMYRKIYKAEFKCPPWFSPKAKRLJSRJLDPNPETRITIAEIMEDPW        |
| Motif 4        | PNIVRLYEVMATKTKIYFVMEYVKGGELFBKIAKGG                      |
| Motif 5        | KYELGRLLGZGTFKVVYHARNIETGESVA                             |
| Motif 6        | GQLSVAAEIFEVTPSLVVVEVKSGGDTLEYHKFYK                       |
| Motif 7        | JKVGMIEQIKREISIMRLVRH                                     |
| Motif 8        | DESKRETRFTSKKPASEIISKJEEIA                                |
| Motif 9        | LNAFDJISLSS                                               |
| Motif 10       | DLRPALKDIVWKWQG                                           |
| Motif 11       | GFDLSGLF                                                  |
| Motif 12       | IKVIDKEK                                                  |
| Motif 13       | KPMGFKVRKKBYKLRLEGEKE                                     |
| Motif 14       | FKKGYKPIKFYEEDD                                           |
| Motif 15       | NLDDVDVAFDDSEES                                           |
| Motif 16       | KELNLKVKKKKDFKVKLEGKK                                     |
| Motif 17       | QEQZQQQQPPQQEQPEQEEP                                      |
| Motif 18       | MENKGSVL                                                  |
| Motif 19       | GSMRPAS                                                   |
| Motif 20       | TDQIRP                                                    |

**Table S3.** Comparison of CBL and CIPK CDS sequences in reference genomes and LXH.

| <b>Sequence</b>  | <b>SNPs or Gaps</b>        |
|------------------|----------------------------|
| <i>PprCIPK1</i>  | 0                          |
| <i>PprCIPK2</i>  | 0                          |
| <i>PprCIPK3</i>  | 0                          |
| <i>PprCIPK4</i>  | 0                          |
| <i>PprCIPK5</i>  | 0                          |
| <i>PprCIPK6</i>  | 0                          |
| <i>PprCIPK7</i>  | 1 SNP, "C" to "T" (Fig S1) |
| <i>PprCIPK10</i> | 0                          |
| <i>PprCIPK11</i> | 0                          |
| <i>PprCIPK12</i> | 0                          |
| <i>PprCIPK13</i> | 0                          |
| <i>PprCIPK14</i> | 0                          |
| <i>PprCIPK15</i> | 1 SNP, "G" to "A" (Fig S2) |
| <i>PprCIPK16</i> | 0                          |
| <i>PprCIPK17</i> | 0                          |
| <i>PprCIPK18</i> | 0                          |

*PprCBL1*  
*PprCBL3*  
*PprCBL4*  
*PprCBL5*  
*PprCBL8*

0  
0  
1 Gap, lost “AAGTATCTTGGT” (Fig S3)  
2 SNP, “A” to “G”; “G” to “A” (Fig S4)  
0

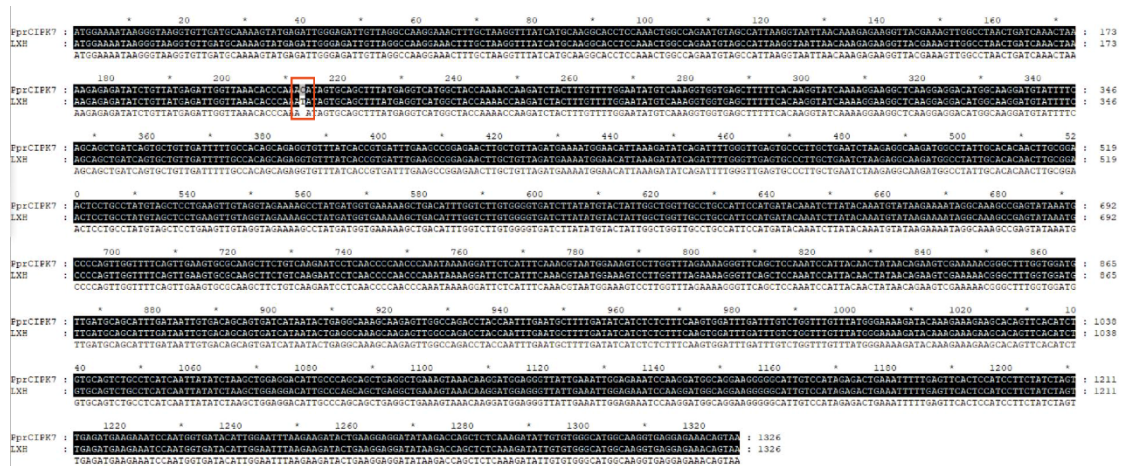

Figure S1. Comparison of *PprCIPK7* CDS sequences in reference genomes and LXH.

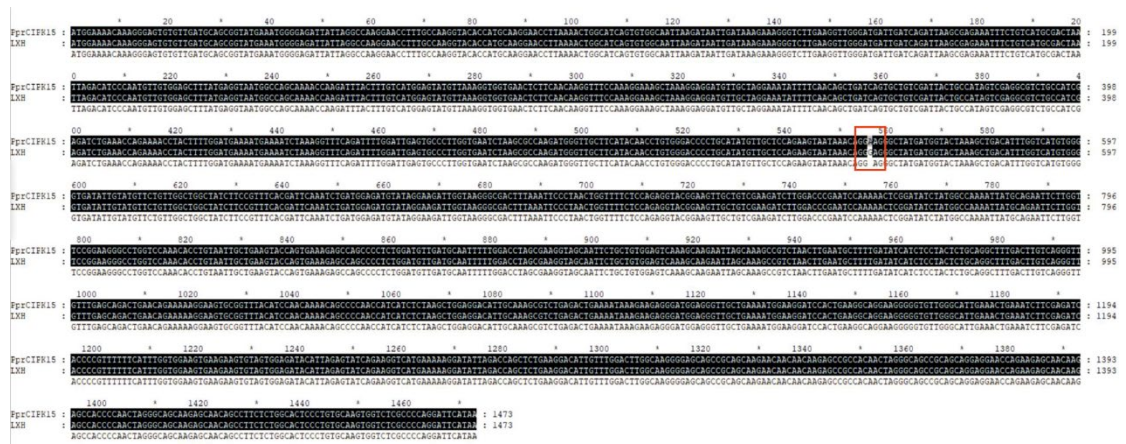

Figure S2. Comparison of *PprCIPK15* CDS sequences in reference genomes and LXH.

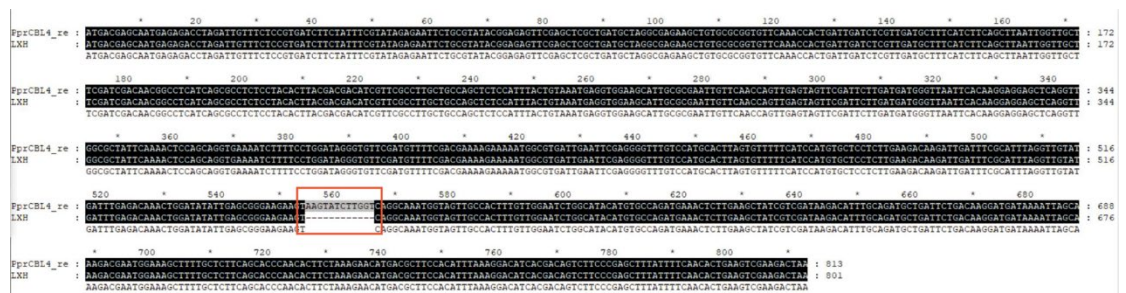

**Figure S3.** Comparison of *PprCBL4* CDS sequences in reference genomes and LXH.

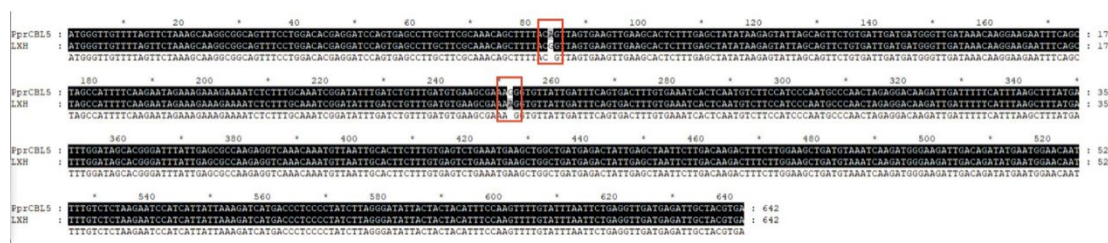

**Figure S4.** Comparison of *PprCBL5* CDS sequences in reference genomes and LXH.

**Table S6.** Sequences of primers used for cloning genes and vectors construction and RT-qPCR.

| Primer name | Sequence                  | Description                          |
|-------------|---------------------------|--------------------------------------|
| PpCBL1F     | CCGTTTATAGCAATCATAGAGGTGT | primers used for RT-qPCR of PpCBL1   |
| PpCBL1R     | CCTCCAGCTCATTAACGGTAAAT   |                                      |
| PpCBL2F     | CCAAAACCCCCCTTTCTGTG      | primers used for RT-qPCR of PpCBL2   |
| PpCBL2R     | AAAAGTTCAAGCTGGAGCTCTTC   |                                      |
| PpCBL3F     | GCTGCTGAAACACCCCTTACAGT   | primers used for RT-qPCR of PpCBL3   |
| PpCBL3R     | TTGTTTTTGAAGAGTGCAAGCTG   |                                      |
| PpCBL4F     | CAGCTTAATTGGTTGCTTCGAT    | primers used for RT-qPCR of PpCBL4   |
| PpCBL4R     | GAACAATTCGCGCAATGCT       |                                      |
| PpCBL5F     | GTTCTGTGATTGATGATGGGTTG   | primers used for RT-qPCR of PpCBL5   |
| PpCBL5R     | TGAGTGATTTACAAAGTCACTGAA  |                                      |
| PpCBL6F     | CTCGAAACATGACGGGGTAATAG   | primers used for RT-qPCR of PpCBL6   |
| PpCBL6R     | TCACCTCTTCACGTTTCGATGAA   |                                      |
| PpCBL7F     | CTGTTTAAGAACTAAGCAGTTCAT  | primers used for RT-qPCR of PpCBL7   |
| PpCBL7R     | TACGCTTGATGTCAAACAAGTCA   |                                      |
| PpCBL8F     | GAGACAGTGTTACGCGTGAGTGA   | primers used for RT-qPCR of PpCBL8   |
| PpCBL8R     | TTGTTTGTCTTGAATAATGCCAGTT |                                      |
| PpCIPK1F    | GAAGGAGGTTGCGCTGAGTTT     | primers used for RT-qPCR of PpCIPK1  |
| PpCIPK1R    | CAGCTCTCAACTCCTCCCAAAG    |                                      |
| PpCIPK2F    | GAGGTGATTGGTACAAAGACCAAA  | primers used for RT-qPCR of PpCIPK2  |
| PpCIPK2R    | AAAAAGCTTTCTTGATCTCCTTC   |                                      |
| PpCIPK3F    | CCAACGTTGTCAGATTACACGAG   | primers used for RT-qPCR of PpCIPK3  |
| PpCIPK3R    | AACTGTTGGAAGAGCTTCCTGC    |                                      |
| PpCIPK4F    | GCTCAGCCACGGCGATTA        | primers used for RT-qPCR of PpCIPK4  |
| PpCIPK4R    | CAGCCCTTTCCTTCCCTCA       |                                      |
| PpCIPK5F    | AGGCGATACTTCCACCAGCTAA    | primers used for RT-qPCR of PpCIPK5  |
| PpCIPK5R    | GGCAATGCACTCAGACCAAAA     |                                      |
| PpCIPK6F    | ACAGCAAGTGCGGGAAGATG      | primers used for RT-qPCR of PpCIPK6  |
| PpCIPK6R    | AGAGAATGACCCCAAGACCA      |                                      |
| PpCIPK7F    | GACATTGCCAGCAGCTGA        | primers used for RT-qPCR of PpCIPK7  |
| PpCIPK7R    | CTCTATGGACAATGCCCCCTT     |                                      |
| PpCIPK8F    | CTCCACCATTTTTCAATGCTTTC   | primers used for RT-qPCR of PpCIPK8  |
| PpCIPK8R    | AGCACTTGGACGTGAACATCG     |                                      |
| PpCIPK9F    | AAGATGGGACCCTGAAATTGC     | primers used for RT-qPCR of PpCIPK9  |
| PpCIPK9R    | GAGAGGGCTTTAAGTCATGGTCA   |                                      |
| PpCIPK10F   | TTTCAGTGAGGAAGAAGGATTGC   | primers used for RT-qPCR of PpCIPK10 |
| PpCIPK10R   | AACCTCCAAAACCACCAAAGAC    |                                      |
| PpCIPK11F   | GTGCACTACCTCAGCAAGTTTCG   | primers used for RT-qPCR of PpCIPK11 |
| PpCIPK11R   | TTTTGCTCCATCATACCCCTTTG   |                                      |
| PpCIPK12F   | AGGGTGAGGAGGAAGAAGGAGT    | primers used for RT-qPCR of PpCIPK12 |

|              |                                                       |                                                           |
|--------------|-------------------------------------------------------|-----------------------------------------------------------|
| PpCIPK12R    | TCTTCCACATCTCCCTTGAAGG                                |                                                           |
| PpCIPK13F    | AATGGGGATTTTGTCCATAGATG                               | primers used for RT-qPCR of PpCIPK13                      |
| PpCIPK13R    | GCCAAACCCAGACTATATCTTGC                               |                                                           |
| PpCIPK14F    | CCAAATTATGTTGCTCCTGAGGT                               | primers used for RT-qPCR of PpCIPK14                      |
| PpCIPK14R    | GGTCATAAGATTAGAATCATCAAAAGG                           |                                                           |
| PpCIPK15F    | GACTTGGCAAGGGGAGCAG                                   | primers used for RT-qPCR of PpCIPK15                      |
| PpCIPK15R    | TTGCTCTTGCTGCCCTAGTTG                                 |                                                           |
| PpCIPK16F    | ATGGTAATTTTCGTGGTGATGATTG                             | primers used for RT-qPCR of PpCIPK16                      |
| PpCIPK16R    | TCGCTGGCTACATTCACTTTGT                                |                                                           |
| PpCIPK17F    | ATGGCTGGATATCTCCCATTG                                 | primers used for RT-qPCR of PpCIPK17                      |
| PpCIPK17R    | TGTATCAGAGAATTTGCCTCAGGA                              |                                                           |
| PpCIPK18F    | GGTAGCCAAGGCTGGCAAG                                   | primers used for RT-qPCR of PpCIPK18                      |
| PpCIPK18R    | CACAAACGACGGCGTCATC                                   |                                                           |
| PpCBL1-ADF   | GCCATGGAGGCCAGTGAATTCATGGATTTCTCGGTAAAAAG<br>ATCG     | primers used for inserting PpCBL1 into vector<br>pGADT7   |
| PpCBL1-ADR   | ATTCATCTGCAGCTCGAGCTCTCAGTAGGAAAAGACTTCAA<br>ATTCTGA  |                                                           |
| PpCBL3-ADF   | GCCATGGAGGCCAGTGAATTCATGGGTGCTATTGGTCAAA<br>G         | primers used for inserting PpCBL3 into vector<br>pGADT7   |
| PpCBL3-ADR   | ATTCATCTGCAGCTCGAGCTCTCATATTTCTGAATCTTCAAC<br>TTCAGAG |                                                           |
| PpCBL5-ADF   | GCCATGGAGGCCAGTGAATTCATGGGTTGTTTTAGTTCTAAA<br>GCAA    | primers used for inserting PpCBL5 into vector<br>pGADT7   |
| PpCBL5-ADR   | ATTCATCTGCAGCTCGAGCTCTCACGTAGCAATCTCATCAAC<br>CT      |                                                           |
| PpCBL8-ADF   | GCCATGGAGGCCAGTGAATTCATGTTGCAGTGCATAGAGGG<br>G        | primers used for inserting PpCBL8 into vector<br>pGADT7   |
| PpCBL8-ADR   | ATTCATCTGCAGCTCGAGCTCTCAGGTGTCGTCCACTTGTGA<br>G       |                                                           |
| PpCIPK1-BDF  | ATGGCCATGGAGGCCGAATTCATGGACCAAGGGGTCCCA               | primers used for inserting PpCIPK1 into vector<br>pGBKT7  |
| PpCIPK1-BDR  | CCGCTGCAGGTCGACGGATCCTCAAACGACGACGTTATGCC             |                                                           |
| PpCIPK2-BDF  | ATGGCCATGGAGGCCGAATTCATGGGACTTGCCAGCAACA              | primers used for inserting PpCIPK2 into vector<br>pGBKT7  |
| PpCIPK2-BDR  | CCGCTGCAGGTCGACGGATCCTCAAGACGATGAATAGCCA<br>CG        |                                                           |
| PpCIPK3-BDF  | ATGGCCATGGAGGCCGAATTCATGGTGATCGTAAGAAAAG<br>GTGC      | primers used for inserting PpCIPK3 into vector<br>pGBKT7  |
| PpCIPK3-BDR  | CCGCTGCAGGTCGACGGATCCTCACACTTGGCTAGTCAACA<br>ACC      |                                                           |
| PpCIPK4-BDF  | ATGGCCATGGAGGCCGAATTCATGGAAGAAAGGACTGTCTT<br>GTTT     | primers used for inserting PpCIPK4 into vector<br>pGBKT7  |
| PpCIPK4-BDR  | CCGCTGCAGGTCGACGGATCCTCATGAGTCTTGTGATCAC<br>CCT       |                                                           |
| PpCIPK5-BDF  | ATGGCCATGGAGGCCGAATTCATGGTGCTGAGGAAAGTGG<br>GTA       | primers used for inserting PpCIPK5 into vector<br>pGBKT7  |
| PpCIPK5-BDR  | CCGCTGCAGGTCGACGGATCCTCAACGCTTTTACTTTTACT<br>CTTGC    |                                                           |
| PpCIPK6-BDF  | ATGGCCATGGAGGCCGAATTCATGGAGAAGATGAGTGCGG<br>C         | primers used for inserting PpCIPK6 into vector<br>pGBKT7  |
| PpCIPK6-BDR  | CCGCTGCAGGTCGACGGATCCTTATTTCTTGATCCTTCAGT<br>AGTTTC   |                                                           |
| PpCIPK7-BDF  | ATGGCCATGGAGGCCGAATTCATGGAAAATAAGGGTAAGG<br>TGTTGA    | primers used for inserting PpCIPK7 into vector<br>pGBKT7  |
| PpCIPK7-BDR  | CCGCTGCAGGTCGACGGATCCTTACTGTTTCTCCTCACCTTG<br>CC      |                                                           |
| PpCIPK10-BDF | ATGGCCATGGAGGCCGAATTCATGGCAAACCTCACCACCA              | primers used for inserting PpCIPK10 into<br>vector pGBKT7 |

|              |                                                        |                                                           |
|--------------|--------------------------------------------------------|-----------------------------------------------------------|
| PpCIPK10-BDR | CCGCTGCAGGTCGACGGATCCCTATTGAGAATCTGAAGGTA<br>GATATGAAG |                                                           |
| PpCIPK11-BDF | ATGGCCATGGAGGCCGAATTCATGTCGTCGAGGTCGGCG                | primers used for inserting PpCIPK11 into vector<br>pGBKT7 |
| PpCIPK11-BDR | CCGCTGCAGGTCGACGGATCCTCAAGATGGCAGAGCACCG               |                                                           |
| PpCIPK12-BDF | ATGGCCATGGAGGCCGAATTCATGCCAGAGATCGAACAGC<br>AG         | primers used for inserting PpCIPK12 into vector<br>pGBKT7 |
| PpCIPK12-BDR | CCGCTGCAGGTCGACGGATCCTCAATCAGCTGGGCAGTGC               |                                                           |
| PpCIPK13-BDF | ATGGCCATGGAGGCCGAATTCATGGAGAATAAATCGAATGT<br>GCTG      | primers used for inserting PpCIPK13 into vector<br>pGBKT7 |
| PpCIPK13-BDR | CCGCTGCAGGTCGACGGATCCCTATTGTGGCTGATGCTGTTT<br>TAGT     |                                                           |
| PpCIPK14-BDF | ATGGCCATGGAGGCCGAATTCATGAATCAACCAAAAATCA<br>AGCG       | primers used for inserting PpCIPK14 into vector<br>pGBKT7 |
| PpCIPK14-BDR | CCGCTGCAGGTCGACGGATCCTTACTTCACTTTTTCATATC<br>CTCCT     |                                                           |
| PpCIPK15-BDF | ATGGCCATGGAGGCCGAATTCATGGAAAACAAAGGGAGTG<br>TGTT       | primers used for inserting PpCIPK15 into vector<br>pGBKT7 |
| PpCIPK15-BDR | CCGCTGCAGGTCGACGGATCCTTATGAATCCTGGGGCGAGA              |                                                           |
| PpCIPK16-BDF | ATGGCCATGGAGGCCGAATTCATGCCGGAGATCGAGGTAGT              | primers used for inserting PpCIPK16 into vector<br>pGBKT7 |
| PpCIPK16-BDR | CCGCTGCAGGTCGACGGATCCTTAATTACCGGCGACGTCC               |                                                           |
| PpCIPK17-BDF | ATGGCCATGGAGGCCGAATTCATGAAGAAGGTGTCGAGAA<br>AGGTAG     | primers used for inserting PpCIPK17 into vector<br>pGBKT7 |
| PpCIPK17-BDR | CCGCTGCAGGTCGACGGATCCTCAGCAAGTCATTGTTCGAA<br>GC        |                                                           |
| PpCIPK18-BDF | ATGGCCATGGAGGCCGAATTCATGGCGGATGAAAAAGGCA               | primers used for inserting PpCIPK18 into vector<br>pGBKT7 |
| PpCIPK18-BDR | CCGCTGCAGGTCGACGGATCCTCAAGCAGCCGTCGAACTG<br>T          |                                                           |

---
